# Supplementary material for: Large mesoporous carbons decorated with silver and gold nanoparticles by a self-assembly method: enhanced electrocatalytic activity for H2O2 electroreduction and sodium nitrite electrooxidation
Source: Royal Society of Chemistry journal article supplement (doi:10.1039/c4ra14374d), 2014-12-02
Supplement: c4ra14374d1.pdf [file c4ra14374d1.pdf]

## Supplemental Information

### **Large mesoporous carbons decorated with silver, gold nanoparticles by self-assembly method: Enhanced electrocatalytic activity for H<sub>2</sub>O<sub>2</sub> electroreduction and sodium nitrite electrooxidation**

Xuejuan Yang,<sup>a, b</sup> Yinhu Wang,<sup>a, b</sup> Jing Bai,<sup>b</sup> Xiaoying He<sup>a\*</sup> and Xiue Jiang<sup>b\*</sup>

*<sup>a</sup>China West Normal University, Nanchong 637002, China*

*<sup>b</sup>State Key Laboratory of Electroanalytical Chemistry, Changchun Institute of Applied Chemistry, Chinese Academy of Science, Changchun 130022, China*

\*Corresponding author. Tel/Fax: +86 817 2185612. E-mail address:

*[jiangxiue@ciac.ac.cn](mailto:jiangxiue@ciac.ac.cn)*

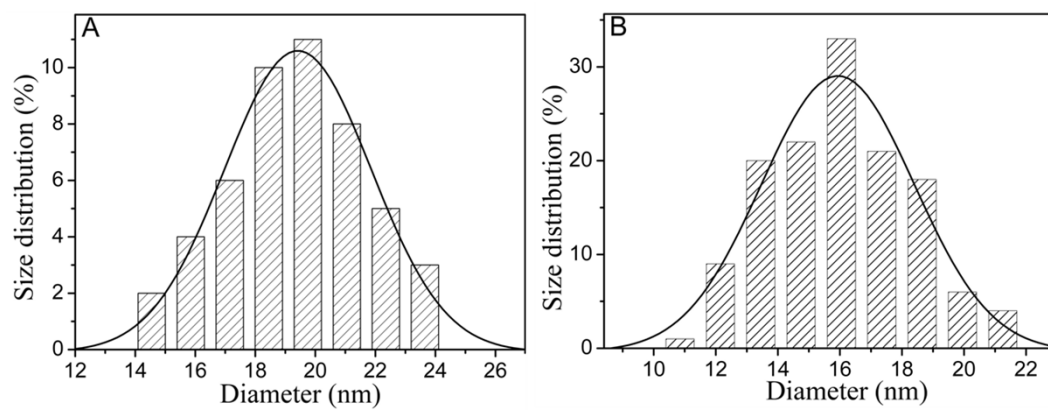

Figure S1. Histograms of particle size distribution of Ag NPs (A) and Au NPs (B).

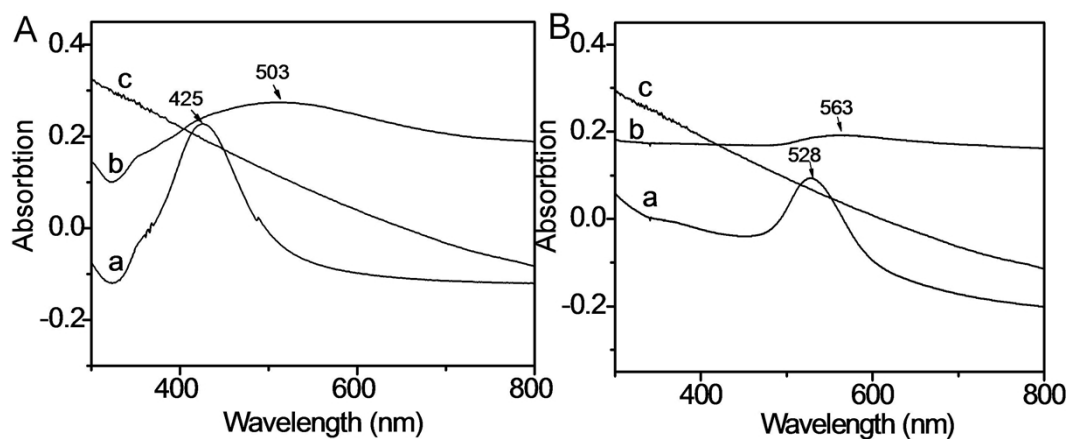

Figure S2. UV-vis spectra of (A) AgNPs (a), the as-prepared AgNPs/PDDA-LMC (b), and PDDA-LMC (c); (B) AuNPs (a), the as-prepared AuNPs/PDDA-LMC (b), and PDDA-LMC (c).

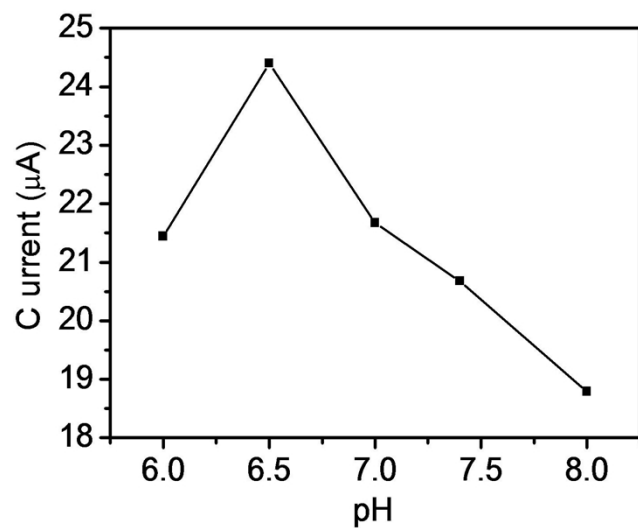

Figure S3. The amperometric responses of the AgNPs/PDDA-LMC/GCE to the addition of 1.0 mM H<sub>2</sub>O<sub>2</sub> in 0.2 M PBS with different pH values from 6.0 to 8.0.

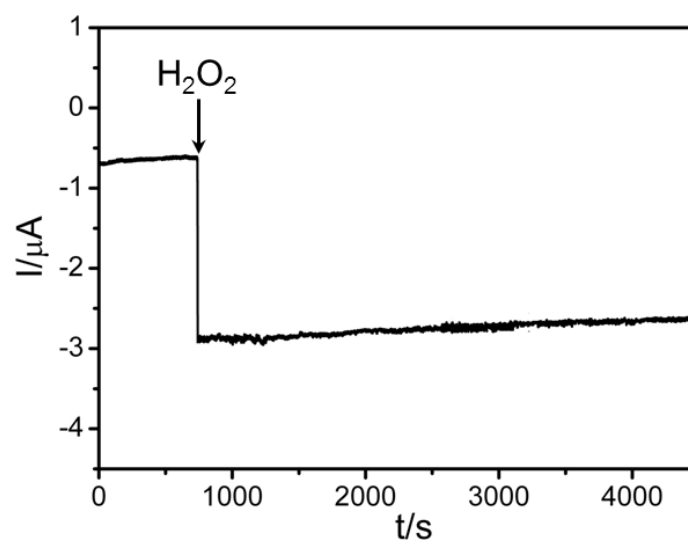

Figure S4. Operational stability of the Nafion/AgNPs/PDDA-LMC/GC electrode under continuous polarization at the potential of -0.4 V in a stirred supporting electrolyte solution containing 0.1 mM of  $\text{H}_2\text{O}_2$ .

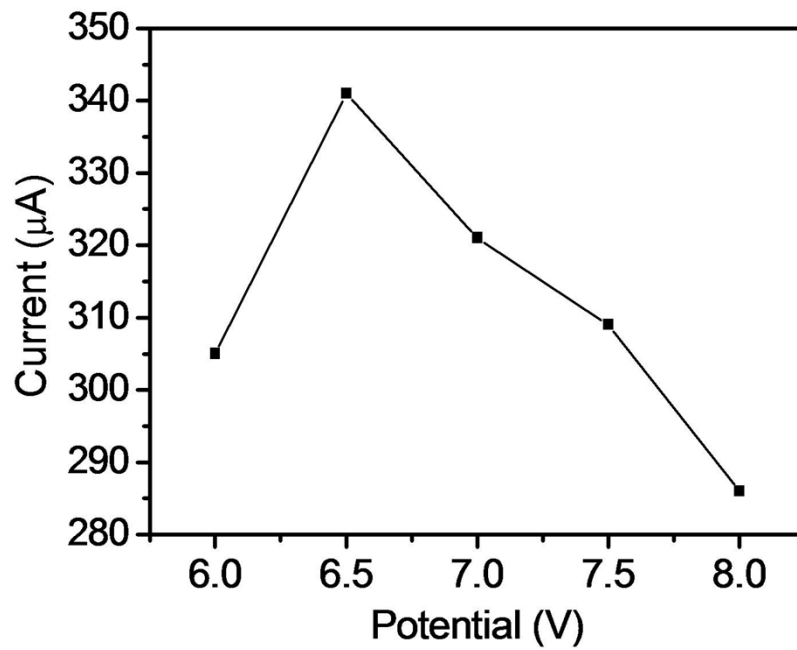

Figure S5. The amperometric responses of AuNPs/PDDA-LMC/GCE to the addition of 10 mM  $\text{NaNO}_2$  in 0.2 M PBS with different pH values from 6.0 to 8.0.

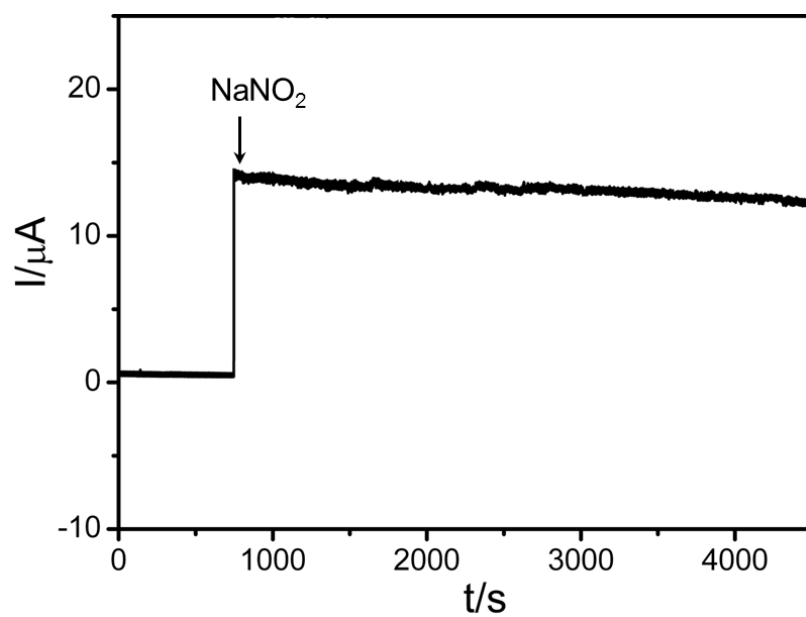

Figure S6. Operational stability of the AuNPs/PDDA-LMC/GC electrode under continuous polarization at the potential of +0.8 V in a stirred supporting electrolyte solution containing 1.0 mM of NaNO<sub>2</sub>.

Table S1 A comparison of this work with literature work regarding the performance of the H<sub>2</sub>O<sub>2</sub> sensor based on AgNPs/PDDA-LMC-modified electrode.

| Type of electrode                        | Performance    |                   | Ref.      |
|------------------------------------------|----------------|-------------------|-----------|
|                                          | LOD ( $\mu$ M) | Linear range (mM) |           |
| Hb/SAa-MWCNTsb /GC                       | 16.41          | 0.04-0.2          | 1         |
| AgNPs-GN/GCE                             | 7              | 0.1-10            | 2         |
| LMC/GCE                                  | 44             | -                 | 3         |
| PEDOT/AgNPs/GCE                          | 7              | -                 | 4         |
| AgNPs/SBA-15/GCE                         | 12             | 0.049-970         | 5         |
| AgNPs/PQ11/GN/GCE                        | 28             | 0.1-40            | 6         |
| Pt <sub>1</sub> Pd <sub>1</sub> /LMC/GCE | 0.30           | 0.0005-27         | 7         |
| I-Au (poly) electrode                    | 10             | 0.01-60           | 8         |
| PABS/GCE                                 | 10             | 0.05-0.55         | 9         |
| Fe <sub>3</sub> O <sub>4</sub> /chitosan | 7.4            | 0.025-5.0         | 10        |
| Ag-PVA <sup>i</sup> /Pt                  | 10             | 0.045-6           | 11        |
| AgNPs/PDDA-LMC/GCE                       | 6.5            | 0.02-9.62         | This work |



Table S2 A comparison of this work with literature work regarding the performance of the NaNO<sub>2</sub> assay using the AuNPs/PDDA-LMC/GCE.

| Type of electrode                          | Performance    |                  | Ref.      |
|--------------------------------------------|----------------|------------------|-----------|
|                                            | LOD ( $\mu$ M) | Linear range(mM) |           |
| Pt/Cha/GCE                                 | 0.4            | 0.0012-0.9       | 12        |
| AgNP/GCE                                   | 1.2            | 0.01-1           | 13        |
| Pt-Fe(III) /GCE                            | 0.47           | 0.001-11         | 14        |
| G4-NH <sub>4</sub> c/MWNT-modified GC      | 2              | 0.005-1.5        | 15        |
| SOD1d-CNT-PPye-Pt electrode                | 0.50           | 0.0005-2         | 16        |
| Nano-Ptf /P3MTg /GCE                       | 1.5            | 0.008-1.7        | 17        |
| Hb-PM/GC electrode                         | 20             | 0.11-1.88        | 18        |
| SA-Fe <sub>2</sub> O <sub>3</sub> -IL/CILE | 1300           | 4.0-140          | 19        |
| Hb/GG-AgNPs/CPE                            | 7.5            | 0.02-0.1         | 20        |
| Cht-Hb-MWCNT-RTILs/CILE                    | 100            | 0.4-8            | 21        |
| Pt NPs/Au electrode                        | 5              | 0.01-1           | 22        |
| CDP-GS-MWCNTs/GCE                          | 1.65           | 0.005-6.75       | 23        |
| CR-GO/GCE                                  | 1              | 0.0089-0.167     | 24        |
| Cobalt nano flowers                        | 1.2            | 0.1-2.15         | 25        |
| GC/poly-TBO-SWCNT                          | 0.37           | 0.001-4          | 26        |
| CPE/L-SCMNPs                               | 0.62           | 0.00091-0.13     | 27        |
| GC/CNF/hemin                               | 318            | 5-250            | 28        |
| AuNPs/PDDA-LMC                             | 0.42           | 0.005-7.24       | This work |

## References

- 1 H.Y. Zhao, W. Zheng, Z.X. Meng, H.M. Zhou, X.X. Xu, Z. Li, Y.F. Zheng, *Biosens. Bioelectron.*, 2009, **24**, 2352-2357.
- 2 Y. Zhang, S. Liu, L. Wang, X. Qin, J. Tian, W. Lu, G. Chang, X. Sun, *RSC Adv.*, 2012, **2**, 538-545.
- 3 J. Bai, B. Lu, X. Bo, L. Guo, *Electrochem. Commun.*, 2010, **12**, 1563-1567.
- 4 A. Balamurugan, S.-M. Chen, *Electroanalysis*, 2009, **21**, 1419-1423.
- 5 D.-H. Lin, Y.-X. Jiang, Y. Wang and S.-G. Sun, *J. Nanomater.*, 2008, **2008**, 1.
- 6 S. Liu, J. Tian, L. Wang, H. Li, Y. Zhang, X. Sun, *Macromolecules*, 2010, **43**, 10078-10083.
- 7 H. Wang, X. Bo, J. Bai, L. Wang, L. Guo, *J. Electroanal. Chem.*, 2011, **662**, 281-287.
- 8 M.R. Miah, T. Ohsaka, *Anal. Chem.*, 2006, **78**, 1200-1205.
- 9 S.A. Kumar, S.-M. Chen, *J. Mol. Catal. A: Chem.*, 2007, **278**, 244-250.
- 10 M.S. Lin, H.J. Leu, *Electroanalysis*, 2005, **17**, 2068-2073.
- 11 M.R. Guascito, E. Filippo, C. Malitesta, D. Manno, A. Serra, A. Turco, *Biosens. Bioelectron.* 2008, **24**, 1057-1063.
- 12 P. Wang, F. Li, X. Huang, Y. Li, L. Wang, *Electrochem. Commun.*, 2008, **10**, 195-199.
- 13 Z. Wang, F. Liao, T. Guo, S. Yang, C. Zeng, *J. Electroanal. Chem.*, 2012, **664**, 135-138.
- 14 S. Wang, Y. Yin, X. Lin, *Electrochem. Commun.*, 2004, **6**, 259-262.
- 15 N. Zhu, Q. Xu, S. Li, H. Gao, *Electrochem. Commun.*, 2009, **11**, 2308-2311.
- 16 S. Rajesh, A.K. Kanugula, K. Bhargava, G. Ilavazhagan, S. Kotamraju, C. Karunakaran, *Biosens. Bioelectron.*, 2010, **26**, 689-695.
- 17 Y. Zhou, H. Xian, F. Li, S. Wu, Q. Lu, Y. Li, L. Wang, *Electrochim. Acta*, 2010, **55**, 5905-5910.
- 18 Y. Sun, S. Wang, *Am. J. Biomed. Sci.*, 2009, 171-177.
- 19 T. Zhan, M. Xi, Y. Wang, W. Sun, W. Hou, *J. Colloid Interface Sci.*, 2010, **346**, 188-193.
- 20 A. Salimi, E. Sharifi, A. Noorbakhsh, S. Soltanian, *Electrochem. Commun.*, 2006, **8**, 1499-1508.
- 21 Z. Zhu, L. Qu, X. Li, Y. Zeng, W. Sun, X. Huang, *Electrochim. Acta*, 2010, **55**, 5959-5965.
- 22 A.S. Adekunle, J. Pillay, K.I. Ozoemena, *Electrochim. Acta*, 2010, **55**, 4319-4327.
- 23 Y. Zhang, R. Yuan, Y. Q. Chai, W. J. Li, X. Zhong and H. A. Zhong, *Biosens. Bioelectron.*, 2011, **26**, 3977-3980.

- 24 V. Mani, A. P. Periasamy and S.-M. Chen, *Electrochem. Commun.*, 2012, **17**, 75-78.
- 25 H. Heli, I. Eskandari, N. Sattarahmady and A. A. Moosavi-Movahedi, *Electrochim. Acta*, 2012, **77**, 294-301.
- 26 D. Gligor and A. Walcarius, *J. Solid State Electrochem.*, 2014, **18**, 1519-1528.
- 27 A. Afkhami, T. Madrakian, H. Ghaedi, H. Khanmohammadi, *Electrochim. Acta* 2012, **66**, 255–264.
- 28 F. Valentini, L. Cristofanelli, M. Carbone, G. Palleschi, *Electrochim. Acta* 2012, **63**, 37–46.
